# Supplementary material for: Behavioural factors matter for the adoption of climate-smart agriculture
Source: Springer Nature journal article supplement (doi:10.1038/s41598-023-50264-4), 2024-01-08
Supplement: 41598_2023_50264_MOESM1_ESM.pdf [file 41598_2023_50264_MOESM1_ESM.pdf]

**Behavioural Factors Matter for the Adoption of  
Climate-Smart Agriculture**  
Supplementary Tables

Martin Paul Jr, Tabe-Ojong, Marvin E., Kedinga & Bisrat Haile Gebrekidan

# Table of Contents

|          |                                                                                                 |           |
|----------|-------------------------------------------------------------------------------------------------|-----------|
| <b>1</b> | <b>Descriptive statistics</b> . . . . .                                                         | <b>4</b>  |
| <b>2</b> | <b>Main regression tables</b> . . . . .                                                         | <b>6</b>  |
| <b>3</b> | <b>Cross country heterogeneity</b> . . . . .                                                    | <b>11</b> |
| <b>4</b> | <b>MVP of the relationship between aspirations, aspiration failures and CSA practices</b> . . . | <b>16</b> |
| <b>5</b> | <b>Robustness Checks</b> . . . . .                                                              | <b>21</b> |

## List of Tables

|     |                                                                                                            |    |
|-----|------------------------------------------------------------------------------------------------------------|----|
| S1  | Descriptive statistics by country                                                                          | 4  |
| S2  | Full OLS estimates of the relationship between aspirations and CSA practices                               | 6  |
| S3  | Full OLS estimates of the relationship between aspirations failure and adoption of CSA practices           | 8  |
| S4  | U-shaped tests of aspiration failure                                                                       | 10 |
| S5  | Full OLS estimates of the relationship between aspirations and CSA practices by country                    | 12 |
| S6  | Full OLS estimates of the relationship between aspirations failure and CSA practices by country            | 14 |
| S7  | MVP of the relationship between aspirations and CSA practices                                              | 17 |
| S8  | MVP of the relationship between aspiration failure and CSA practices                                       | 19 |
| S9  | Full Poisson and Ordered probit estimates of the relationship between aspiration and CSA practices         | 22 |
| S10 | Full Poisson and Ordered probit estimates of the relationship between aspiration failure and CSA practices | 24 |

# 1 Descriptive statistics

Table S1: Descriptive statistics by country

| Characteristic                | Cameroon, N = 582 | Kenya, N = 530 | p-value |
|-------------------------------|-------------------|----------------|---------|
| Crop rotation (1/0)           | 403 (69%)         | 223 (42%)      | <0.001  |
| Intercropping (1/0)           | 380 (65%)         | 220 (42%)      | <0.001  |
| Fallowing (1/0)               | 355 (61%)         | 90 (17%)       | <0.001  |
| Organic soil amendments (1/0) | 207 (36%)         | 133 (25%)      | <0.001  |
| Number of CSA adopted         |                   |                | <0.001  |
| 0                             | 32 (5.5%)         | 139 (26%)      |         |
| 1                             | 135 (23%)         | 202 (38%)      |         |
| 2                             | 113 (19%)         | 117 (22%)      |         |
| 3                             | 224 (38%)         | 58 (11%)       |         |
| 4                             | 78 (13%)          | 14 (2.6%)      |         |
| Aspirations                   | 13.54 (1.65)      | 10.95 (0.95)   | <0.001  |
| Aspiration gap (0-1)          | 0.76 (0.22)       | 0.69 (0.19)    | <0.001  |
| Gap squared (0-1)             | 0.63 (0.27)       | 0.52 (0.24)    | <0.001  |
| Income (IHS)                  | 11.74 (1.00)      | 9.48 (1.25)    | <0.001  |
| Off-farm activity (1/0)       | 169 (29%)         | 144 (27%)      | 0.5     |
| Household size (num)          | 5.0 (4.2)         | 5.9 (2.8)      | <0.001  |
| Credit access (1/0)           | 108 (19%)         | 228 (43%)      | <0.001  |
| Age of head (years)           | 50 (15)           | 45 (16)        | <0.001  |
| Education level               |                   |                | <0.001  |
| No formal education           | 24 (4.1%)         | 98 (18%)       |         |
| Primary Education             | 253 (43%)         | 172 (32%)      |         |
| Secondary Education           | 275 (47%)         | 234 (44%)      |         |
| University Education          | 30 (5.2%)         | 26 (4.9%)      |         |
| Cooperative membership (1/0)  | 109 (19%)         | 133 (25%)      | 0.010   |
| Extension access (1/0)        | 110 (19%)         | 139 (26%)      | 0.003   |
| Gender of head                |                   |                | 0.8     |
| Female                        | 155 (27%)         | 137 (26%)      |         |
| Male                          | 427 (73%)         | 393 (74%)      |         |
| Asset index                   | 0.01 (1.71)       | 0.00 (1.85)    | 0.8     |

<sup>1</sup> n (%); Mean (SD)

<sup>2</sup> Pearson's Chi-squared test; Wilcoxon rank sum test

*Note:* The table above presents summary statistics of some of the regression variables by country. Two-sided t-tests were used for statistical testing, and the corresponding p-values are presented in the last column. The tests performed are Pearsons Chi-squared test for categorical variables and the Wilcoxon rank sum test for continuous variables.

## 2 Main regression tables

Table S2: Full OLS estimates of the relationship between aspirations and CSA practices

| variables                   | Crop rotation (1/0)            | Intercropping (1/0)          | Fallowing (1/0)                | Organic soil amendments (1/0)  |
|-----------------------------|--------------------------------|------------------------------|--------------------------------|--------------------------------|
| Aspirations                 | 0.024**<br>(0.010)<br>[0.019]  | -0.021<br>(0.014)<br>[0.133] | 0.005<br>(0.009)<br>[0.605]    | 0.029**<br>(0.012)<br>[0.022]  |
| Off-farm activity (10)      | 0.036<br>(0.037)<br>[0.338]    | -0.048<br>(0.039)<br>[0.225] | 0.026<br>(0.032)<br>[0.420]    | -0.032<br>(0.032)<br>[0.317]   |
| Household size (num)        | 0.006<br>(0.004)<br>[0.155]    | 0.004<br>(0.005)<br>[0.346]  | 0.001<br>(0.004)<br>[0.699]    | 0.001<br>(0.004)<br>[0.773]    |
| Credit access (10)          | 0.119***<br>(0.036)<br>[0.001] | 0.060*<br>(0.031)<br>[0.061] | 0.031<br>(0.031)<br>[0.314]    | 0.009<br>(0.036)<br>[0.798]    |
| Age of head (years)         | 0.000<br>(0.001)<br>[0.807]    | 0.000<br>(0.001)<br>[0.879]  | -0.001<br>(0.001)<br>[0.601]   | -0.002<br>(0.001)<br>[0.189]   |
| Educational level (years)   | -0.002<br>(0.004)<br>[0.654]   | 0.001<br>(0.005)<br>[0.904]  | -0.006*<br>(0.003)<br>[0.071]  | -0.006<br>(0.004)<br>[0.153]   |
| Cooperative membership (10) | 0.039<br>(0.037)<br>[0.292]    | 0.028<br>(0.036)<br>[0.436]  | 0.041<br>(0.033)<br>[0.217]    | 0.019<br>(0.035)<br>[0.584]    |
| Extension access (10)       | 0.085**<br>(0.041)<br>[0.043]  | 0.071*<br>(0.040)<br>[0.077] | -0.005<br>(0.033)<br>[0.877]   | 0.046<br>(0.031)<br>[0.139]    |
| Head is male (10)           | 0.009<br>(0.031)<br>[0.780]    | 0.025<br>(0.039)<br>[0.523]  | -0.014<br>(0.028)<br>[0.616]   | 0.001<br>(0.030)<br>[0.974]    |
| Asset index                 | 0.035***<br>(0.012)<br>[0.006] | -0.012<br>(0.017)<br>[0.489] | 0.038***<br>(0.011)<br>[0.001] | 0.034***<br>(0.013)<br>[0.008] |
| Observations                | 1,112                          | 1,112                        | 1,112                          | 1,112                          |
| R-squared                   | 0.342                          | 0.239                        | 0.388                          | 0.226                          |
| F test                      | 5.748                          | 1.653                        | 2.606                          | 3.905                          |

*Note:* The table presents the results of OLS regressions between aspirations and CSA practices, with robust standard errors, where the standard errors are clustered. The statistical tests conducted are two-sided t-tests. P-values are denoted in square brackets. The presence of an asterisk (\*) above a coefficient indicates that the coefficient is statistically different from zero at a predetermined level of significance (\*\*\* p<0.01, \*\* p<0.05, \* p<0.1)

Table S3: Full OLS estimates of the relationship between aspirations failure and adoption of CSA practices

| variables                   | Crop rotation (1/0)            | Intercropping (1/0)             | Fallowing (1/0)                | Organic soil amendments (1/0)  |
|-----------------------------|--------------------------------|---------------------------------|--------------------------------|--------------------------------|
| Aspiration gap (0-1)        | 0.569**<br>(0.271)<br>[0.040]  | 1.218***<br>(0.325)<br>[0.000]  | 0.631**<br>(0.250)<br>[0.014]  | 0.419<br>(0.266)<br>[0.120]    |
| Gap squared (0-1)           | -0.456*<br>(0.244)<br>[0.065]  | -1.208***<br>(0.294)<br>[0.000] | -0.530**<br>(0.212)<br>[0.015] | -0.291<br>(0.227)<br>[0.204]   |
| Off-farm activity (10)      | 0.036<br>(0.038)<br>[0.352]    | -0.064*<br>(0.038)<br>[0.097]   | 0.024<br>(0.033)<br>[0.480]    | -0.029<br>(0.032)<br>[0.363]   |
| Household size (num)        | 0.006<br>(0.004)<br>[0.130]    | 0.004<br>(0.004)<br>[0.308]     | 0.002<br>(0.004)<br>[0.659]    | 0.002<br>(0.004)<br>[0.715]    |
| Credit access (10)          | 0.117***<br>(0.036)<br>[0.002] | 0.057*<br>(0.032)<br>[0.083]    | 0.030<br>(0.031)<br>[0.338]    | 0.007<br>(0.036)<br>[0.843]    |
| Age of head (years)         | 0.000<br>(0.001)<br>[0.947]    | 0.000<br>(0.001)<br>[0.990]     | -0.001<br>(0.001)<br>[0.550]   | -0.002<br>(0.001)<br>[0.153]   |
| Educational level (years)   | -0.001<br>(0.004)<br>[0.789]   | -0.001<br>(0.005)<br>[0.840]    | -0.006*<br>(0.003)<br>[0.071]  | -0.005<br>(0.004)<br>[0.223]   |
| Cooperative membership (10) | 0.035<br>(0.037)<br>[0.348]    | 0.009<br>(0.035)<br>[0.804]     | 0.036<br>(0.031)<br>[0.254]    | 0.018<br>(0.035)<br>[0.596]    |
| Extension access (10)       | 0.086**<br>(0.041)<br>[0.041]  | 0.078*<br>(0.040)<br>[0.053]    | -0.004<br>(0.033)<br>[0.893]   | 0.045<br>(0.031)<br>[0.142]    |
| Head is male (10)           | 0.008<br>(0.031)<br>[0.802]    | 0.012<br>(0.039)<br>[0.754]     | -0.018<br>(0.028)<br>[0.532]   | 0.002<br>(0.030)<br>[0.943]    |
| Asset index                 | 0.039***<br>(0.012)<br>[0.002] | -0.016<br>(0.016)<br>[0.334]    | 0.039***<br>(0.011)<br>[0.001] | 0.039***<br>(0.012)<br>[0.002] |
| Observations                | 1,112                          | 1,112                           | 1,112                          | 1,112                          |
| R-squared                   | 0.341                          | 0.262                           | 0.392                          | 0.222                          |
| F test                      | 6.342                          | 3.600                           | 2.849                          | 3.614                          |

*Note:* The table presents the results of OLS regressions between aspirations failure and CSA practices. Robust standard errors are in brackets. The statistical tests conducted are two-sided t-tests. P-values, denoted in square brackets. The presence of an asterisk (\*) above a coefficient indicates that the coefficient is statistically different from zero at a predetermined level of significance (\*\*\*)  $p < 0.01$ , \*\*  $p < 0.05$ , \*  $p < 0.1$ ).

Table S4: U-shaped tests of aspiration failure

|                                 | <b>Crop rotation</b> | <b>Intercropping</b> | <b>Fallowing</b> | <b>OSA</b>   |
|---------------------------------|----------------------|----------------------|------------------|--------------|
| <b>[A] Pooled</b>               |                      |                      |                  |              |
| Turning point                   | 0.623                | 0.504                | 0.595            | 0.718        |
| Sasabuchi p-value               | 0.071                | <0.001               | 0.016            | 0.215        |
| Slope at minimum                | 0.568                | 1.218                | 0.631            | 0.418        |
| Slope at maximum                | -0.344               | -1.196               | -0.428           | -0.163       |
| Fieller 95% confidence interval | [-Inf; +Inf]         | [0.419; 0.569]       | [0.427; 0.86]    | [-Inf; +Inf] |
| <b>[B] Cameroon</b>             |                      |                      |                  |              |
| Turning point                   | 0.515                | 0.494                | 0.507            | 0.604        |
| Sasabuchi p-value               | 0.067                | 0.002                | 0.019            | 0.169        |
| Slope at minimum                | 0.509                | 1.126                | 0.676            | 0.363        |
| Slope at maximum                | -0.478               | -1.149               | -0.656           | -0.238       |
| Fieller 95% confidence interval | [-Inf; +Inf]         | [0.356; 0.577]       | [0.21; 0.834]    | [-Inf; +Inf] |
| <b>[C] Kenya</b>                |                      |                      |                  |              |
| Turning point                   | 0.7                  | 0.555                | 0.803            | 0.696        |
| Sasabuchi p-value               | 0.142                | 0.054                | 0.267            | 0.229        |
| Slope at minimum                | 0.916                | 0.897                | 0.555            | 0.717        |
| Slope at maximum                | -0.392               | -0.716               | -0.136           | -0.312       |
| Fieller 95% confidence interval | [-Inf; +Inf]         | [-Inf; +Inf]         | [-Inf; +Inf]     | [-Inf; +Inf] |

### **3 Cross country heterogeneity**



Table S5: Full OLS estimates of the relationship between aspirations and CSA practices by country

| variables                   | Cameroon                      |                                 |                               |                                | Kenya                          |                               |                                |                                |
|-----------------------------|-------------------------------|---------------------------------|-------------------------------|--------------------------------|--------------------------------|-------------------------------|--------------------------------|--------------------------------|
|                             | Crop rotation (1/0)           | Intercropping (1/0)             | Fallowing (1/0)               | Organic soil amendments (1/0)  | Crop rotation (1/0)            | Intercropping (1/0)           | Fallowing (1/0)                | Organic soil amendments (1/0)  |
| Aspirations                 | 0.024**<br>(0.010)<br>[0.024] | -0.019<br>(0.016)<br>[0.241]    | 0.007<br>(0.009)<br>[0.457]   | 0.022*<br>(0.012)<br>[0.081]   | 0.021<br>(0.034)<br>[0.535]    | -0.007<br>(0.038)<br>[0.856]  | -0.001<br>(0.023)<br>[0.981]   | 0.045<br>(0.035)<br>[0.207]    |
| Off-farm activity (10)      | 0.025<br>(0.057)<br>[0.661]   | -0.068<br>(0.055)<br>[0.226]    | -0.027<br>(0.045)<br>[0.549]  | -0.044<br>(0.044)<br>[0.324]   | 0.059<br>(0.048)<br>[0.231]    | -0.024<br>(0.051)<br>[0.645]  | 0.094**<br>(0.045)<br>[0.045]  | 0.002<br>(0.047)<br>[0.969]    |
| Household size (num)        | 0.003<br>(0.004)<br>[0.508]   | -0.001<br>(0.004)<br>[0.878]    | 0.002<br>(0.004)<br>[0.678]   | 0.001<br>(0.005)<br>[0.852]    | 0.013<br>(0.008)<br>[0.138]    | 0.011<br>(0.009)<br>[0.245]   | 0.001<br>(0.007)<br>[0.913]    | 0.002<br>(0.008)<br>[0.838]    |
| Credit access (10)          | 0.122**<br>(0.057)<br>[0.038] | 0.032<br>(0.040)<br>[0.428]     | 0.121**<br>(0.053)<br>[0.030] | 0.016<br>(0.064)<br>[0.798]    | 0.120**<br>(0.049)<br>[0.020]  | 0.078*<br>(0.043)<br>[0.081]  | -0.019<br>(0.032)<br>[0.554]   | 0.014<br>(0.042)<br>[0.730]    |
| Age of head (years)         | -0.000<br>(0.001)<br>[0.797]  | -0.002<br>(0.001)<br>[0.147]    | -0.002<br>(0.001)<br>[0.159]  | -0.003<br>(0.002)<br>[0.120]   | 0.001<br>(0.002)<br>[0.580]    | 0.002<br>(0.002)<br>[0.339]   | 0.000<br>(0.002)<br>[0.779]    | 0.000<br>(0.002)<br>[0.943]    |
| Educational level (years)   | 0.000<br>(0.005)<br>[0.986]   | 0.004<br>(0.007)<br>[0.602]     | 0.003<br>(0.005)<br>[0.591]   | -0.007<br>(0.006)<br>[0.236]   | -0.003<br>(0.007)<br>[0.649]   | -0.006<br>(0.006)<br>[0.316]  | -0.010**<br>(0.005)<br>[0.040] | -0.003<br>(0.005)<br>[0.472]   |
| Cooperative membership (10) | 0.009<br>(0.049)<br>[0.852]   | 0.042<br>(0.040)<br>[0.299]     | 0.068<br>(0.050)<br>[0.185]   | 0.090*<br>(0.050)<br>[0.082]   | 0.085<br>(0.057)<br>[0.149]    | -0.015<br>(0.058)<br>[0.803]  | 0.027<br>(0.042)<br>[0.518]    | -0.034<br>(0.051)<br>[0.507]   |
| Extension access (10)       | -0.005<br>(0.060)<br>[0.931]  | 0.041<br>(0.059)<br>[0.487]     | -0.068<br>(0.049)<br>[0.180]  | -0.057<br>(0.042)<br>[0.184]   | 0.161***<br>(0.059)<br>[0.010] | 0.114**<br>(0.048)<br>[0.024] | 0.044<br>(0.046)<br>[0.340]    | 0.118***<br>(0.036)<br>[0.002] |
| Head is male (10)           | -0.001<br>(0.042)<br>[0.980]  | -0.031<br>(0.055)<br>[0.571]    | -0.039<br>(0.034)<br>[0.260]  | -0.050<br>(0.037)<br>[0.186]   | 0.031<br>(0.045)<br>[0.491]    | 0.030<br>(0.052)<br>[0.573]   | 0.032<br>(0.043)<br>[0.465]    | 0.087*<br>(0.045)<br>[0.059]   |
| Asset index                 | 0.043**<br>(0.018)<br>[0.026] | -0.083***<br>(0.022)<br>[0.001] | 0.045**<br>(0.018)<br>[0.018] | 0.060***<br>(0.021)<br>[0.006] | 0.022<br>(0.017)<br>[0.194]    | 0.044**<br>(0.018)<br>[0.020] | 0.033**<br>(0.015)<br>[0.035]  | 0.005<br>(0.016)<br>[0.776]    |
| Observations                | 582                           | 582                             | 582                           | 582                            | 530                            | 530                           | 530                            | 530                            |
| R-squared                   | 0.311                         | 0.189                           | 0.315                         | 0.323                          | 0.282                          | 0.307                         | 0.125                          | 0.114                          |
| Additional controls         | Yes                           | Yes                             | Yes                           | Yes                            | Yes                            | Yes                           | Yes                            | Yes                            |
| Village FE                  | No                            | No                              | No                            | No                             | Yes                            | Yes                           | Yes                            | Yes                            |
| F test                      | 2.215                         | 4.160                           | 2.803                         | 2.433                          | 7.010                          | 4.657                         | 2.372                          | 3.224                          |

Note: The table presents the results of OLS regressions between aspirations failure and CSA practices by country. Robust standard errors are in brackets. The statistical tests conducted are two-sided t-tests. P-values are denoted in square brackets. The presence of an asterisk (\*) above a coefficient indicates that the coefficient is statistically different from zero at a predetermined level of significance (\*\*\* p<0.01, \*\* p<0.05, \* p<0.1). All regressions include a comprehensive set of village fixed effects to control for potential unobserved heterogeneity.

Table S6: Full OLS estimates of the relationship between aspirations failure and CSA practices by country

| variables                   | Cameroon                       |                                 |                                |                                | Kenya                         |                               |                                |                                |
|-----------------------------|--------------------------------|---------------------------------|--------------------------------|--------------------------------|-------------------------------|-------------------------------|--------------------------------|--------------------------------|
|                             | Crop rotation (1/0)            | Intercropping (1/0)             | Fallowing (1/0)                | Organic soil amendments (1/0)  | Crop rotation (1/0)           | Intercropping (1/0)           | Fallowing (1/0)                | Organic soil amendments (1/0)  |
| Aspiration gap (0-1)        | 0.510<br>(0.304)<br>[0.102]    | 1.127***<br>(0.375)<br>[0.005]  | 0.677**<br>(0.311)<br>[0.037]  | 0.364<br>(0.288)<br>[0.214]    | 0.916*<br>(0.529)<br>[0.092]  | 0.897<br>(0.544)<br>[0.108]   | 0.555<br>(0.431)<br>[0.206]    | 0.717<br>(0.565)<br>[0.213]    |
| Gap squared (0-1)           | -0.494<br>(0.295)<br>[0.103]   | -1.138***<br>(0.333)<br>[0.002] | -0.667**<br>(0.296)<br>[0.031] | -0.301<br>(0.252)<br>[0.240]   | -0.654<br>(0.437)<br>[0.143]  | -0.807*<br>(0.454)<br>[0.084] | -0.346<br>(0.310)<br>[0.272]   | -0.515<br>(0.480)<br>[0.291]   |
| Off-farm activity (10)      | 0.028<br>(0.057)<br>[0.621]    | -0.071<br>(0.054)<br>[0.195]    | -0.026<br>(0.047)<br>[0.579]   | -0.042<br>(0.044)<br>[0.347]   | 0.067<br>(0.048)<br>[0.178]   | -0.035<br>(0.049)<br>[0.486]  | 0.106**<br>(0.049)<br>[0.037]  | 0.006<br>(0.048)<br>[0.903]    |
| Household size (num)        | 0.003<br>(0.004)<br>[0.421]    | 0.000<br>(0.004)<br>[0.966]     | 0.002<br>(0.004)<br>[0.587]    | 0.001<br>(0.005)<br>[0.799]    | 0.013<br>(0.008)<br>[0.124]   | 0.010<br>(0.009)<br>[0.264]   | 0.001<br>(0.007)<br>[0.842]    | 0.002<br>(0.008)<br>[0.821]    |
| Credit access (10)          | 0.119**<br>(0.056)<br>[0.041]  | 0.030<br>(0.039)<br>[0.460]     | 0.118**<br>(0.053)<br>[0.035]  | 0.013<br>(0.065)<br>[0.838]    | 0.118**<br>(0.050)<br>[0.023] | 0.077*<br>(0.044)<br>[0.093]  | -0.019<br>(0.031)<br>[0.542]   | 0.012<br>(0.043)<br>[0.789]    |
| Age of head (years)         | -0.001<br>(0.001)<br>[0.702]   | -0.002<br>(0.001)<br>[0.128]    | -0.002<br>(0.001)<br>[0.123]   | -0.003<br>(0.002)<br>[0.106]   | 0.001<br>(0.002)<br>[0.527]   | 0.002<br>(0.002)<br>[0.373]   | 0.001<br>(0.002)<br>[0.652]    | 0.000<br>(0.002)<br>[0.973]    |
| Educational level (years)   | -0.001<br>(0.005)<br>[0.913]   | 0.002<br>(0.007)<br>[0.830]     | 0.001<br>(0.005)<br>[0.766]    | -0.008<br>(0.006)<br>[0.211]   | -0.001<br>(0.006)<br>[0.860]  | -0.006<br>(0.006)<br>[0.325]  | -0.010**<br>(0.005)<br>[0.046] | -0.000<br>(0.005)<br>[0.939]   |
| Cooperative membership (10) | -0.001<br>(0.049)<br>[0.989]   | 0.013<br>(0.040)<br>[0.750]     | 0.052<br>(0.046)<br>[0.260]    | 0.086*<br>(0.050)<br>[0.091]   | 0.085<br>(0.059)<br>[0.158]   | -0.016<br>(0.057)<br>[0.778]  | 0.029<br>(0.041)<br>[0.478]    | -0.036<br>(0.052)<br>[0.494]   |
| Extension access (10)       | -0.012<br>(0.060)<br>[0.846]   | 0.037<br>(0.057)<br>[0.524]     | -0.073<br>(0.050)<br>[0.152]   | -0.061<br>(0.043)<br>[0.162]   | 0.159**<br>(0.059)<br>[0.011] | 0.119**<br>(0.050)<br>[0.022] | 0.037<br>(0.043)<br>[0.396]    | 0.123***<br>(0.036)<br>[0.002] |
| Head is male (10)           | 0.004<br>(0.043)<br>[0.935]    | -0.036<br>(0.055)<br>[0.518]    | -0.038<br>(0.035)<br>[0.280]   | -0.045<br>(0.036)<br>[0.217]   | 0.023<br>(0.045)<br>[0.611]   | 0.019<br>(0.052)<br>[0.717]   | 0.027<br>(0.041)<br>[0.510]    | 0.082*<br>(0.045)<br>[0.081]   |
| Asset index                 | 0.051***<br>(0.018)<br>[0.007] | -0.078***<br>(0.020)<br>[0.000] | 0.051***<br>(0.018)<br>[0.009] | 0.066***<br>(0.020)<br>[0.002] | 0.024<br>(0.016)<br>[0.142]   | 0.039**<br>(0.017)<br>[0.029] | 0.033**<br>(0.014)<br>[0.030]  | 0.011<br>(0.016)<br>[0.506]    |
| Observations                | 582                            | 582                             | 582                            | 582                            | 530                           | 530                           | 530                            | 530                            |
| R-squared                   | 0.311                          | 0.216                           | 0.324                          | 0.320                          | 0.286                         | 0.313                         | 0.130                          | 0.112                          |
| F test                      | 2.570                          | 4.618                           | 3.005                          | 2.023                          | 6.858                         | 5.829                         | 2.632                          | 3.818                          |

Note: The table presents the results of OLS regressions between aspirations failure and CSA practices by country. Robust standard errors are in brackets. The statistical tests conducted are two-sided t-tests. P-values is denoted in square brackets. The presence of an asterisk (\*) above a coefficient indicates that the coefficient is statistically different from zero at a predetermined level of significance (\*\*\* p<0.01, \*\* p<0.05, \* p<0.1). All regressions include a comprehensive set of district fixed effects to control for potential unobserved heterogeneity.

#### **4 MVP of the relationship between aspirations, aspiration failures and CSA practices**

Table S7: MVP of the relationship between aspirations and CSA practices

| variables                             | Crop rotation (1/0)  | Intercropping (1/0)   | Fallowing (1/0)        | Organic soil amendments (1/0) |
|---------------------------------------|----------------------|-----------------------|------------------------|-------------------------------|
| Aspirations                           | 0.216***<br>(0.0370) | -0.0594<br>(0.0421)   | 0.0462<br>(0.0302)     | 0.125***<br>(0.0470)          |
| Off-farm activity (10)                | -0.0803<br>(0.103)   | -0.155<br>(0.117)     | 0.0792<br>(0.126)      | -0.140<br>(0.111)             |
| Household size (num)                  | 0.0135<br>(0.0139)   | 0.0151<br>(0.0137)    | 0.00975<br>(0.0145)    | 0.00650<br>(0.0142)           |
| Credit access (10)                    | 0.224**<br>(0.0997)  | 0.209**<br>(0.0986)   | 0.0750<br>(0.115)      | 0.000383<br>(0.114)           |
| Age of head (years)                   | 0.00227<br>(0.00301) | 0.000528<br>(0.00399) | -0.000785<br>(0.00396) | -0.00565<br>(0.00440)         |
| Educational level (years)             | -0.0129<br>(0.0119)  | 0.00122<br>(0.0143)   | -0.0274*<br>(0.0145)   | -0.0179<br>(0.0136)           |
| Cooperative membership (10)           | 0.264**<br>(0.105)   | 0.0867<br>(0.112)     | 0.227*<br>(0.126)      | 0.0815<br>(0.112)             |
| Extension access (10)                 | 0.284**<br>(0.119)   | 0.228*<br>(0.121)     | -0.0331<br>(0.126)     | 0.148<br>(0.0988)             |
| Head is male (10)                     | 0.0140<br>(0.0823)   | 0.0871<br>(0.117)     | -0.0357<br>(0.110)     | 0.0258<br>(0.115)             |
| Asset index                           | 0.0826**<br>(0.0324) | -0.0349<br>(0.0481)   | 0.163***<br>(0.0429)   | 0.106***<br>(0.0389)          |
| Constant                              | -2.734***<br>(0.511) | 0.962<br>(0.695)      | -0.266<br>(0.547)      | -1.510**<br>(0.701)           |
| Observations                          | 1,112                | 1,112                 | 1,112                  | 1,112                         |
| Additional controls                   | Yes                  | Yes                   | Yes                    | Yes                           |
| Village FE                            | Yes                  | Yes                   | Yes                    | Yes                           |
| Year FE                               | Yes                  | Yes                   | Yes                    | Yes                           |
| –                                     | Coefficient          | Std. Err.             |                        |                               |
| atanhrho-12                           | -0.0102              | (0.0785)              |                        |                               |
| atanhrho-13                           | 0.491***             | (0.0989)              |                        |                               |
| atanhrho-14                           | 0.324***             | (0.0855)              |                        |                               |
| atanhrho-23                           | 0.186*               | (0.0996)              |                        |                               |
| atanhrho-24                           | 0.217**              | (0.0844)              |                        |                               |
| atanhrho-34                           | 0.173*               | (0.0929)              |                        |                               |
| Robust standard errors in parentheses |                      |                       |                        |                               |
| *** p<0.01, ** p<0.05, * p<0.1        |                      |                       |                        |                               |

*Note:* This table displays the findings of Multivariate Probit (MVP) regressions, applied to investigate the relationship between aspiration and the adoption of Climate-Smart Agriculture (CSA) practices. Robust standard errors are reported in brackets to control for potential heteroscedasticity. Two-sided t-tests were conducted for the statistical tests, and corresponding p-values are noted within square brackets. Coefficients denoted with an asterisk ( ) represent statistical significance at pre-established levels (\*\* p<0.01, \*\* p<0.05, \* p<0.1). To account for potential unobserved heterogeneity, all regressions incorporate a comprehensive set of village fixed effects.

Table S8: MVP of the relationship between aspiration failure and CSA practices

| variables                                                               | Crop rotation (1/0)  | Intercropping (1/0)   | Fallowing (1/0)        | Organic soil amendments (1/0) |
|-------------------------------------------------------------------------|----------------------|-----------------------|------------------------|-------------------------------|
| Aspiration gap (0-1)                                                    | 0.373<br>(0.879)     | 3.829***<br>(0.972)   | 1.783**<br>(0.903)     | 1.429<br>(1.040)              |
| Gap squared (0-1)                                                       | 0.125<br>(0.776)     | -3.805***<br>(0.887)  | -1.413*<br>(0.747)     | -0.910<br>(0.850)             |
| Off-farm activity (10)                                                  | -0.0336<br>(0.103)   | -0.210*<br>(0.118)    | 0.0802<br>(0.128)      | -0.126<br>(0.110)             |
| Household size (num)                                                    | 0.00890<br>(0.0125)  | 0.0163<br>(0.0130)    | 0.00903<br>(0.0146)    | 0.00687<br>(0.0138)           |
| Credit access (10)                                                      | 0.0707<br>(0.105)    | 0.216**<br>(0.105)    | 0.0350<br>(0.114)      | -0.0348<br>(0.114)            |
| Age of head (years)                                                     | 0.00438<br>(0.00308) | 0.000192<br>(0.00398) | -0.000128<br>(0.00393) | -0.00549<br>(0.00427)         |
| Educational level (years)                                               | 0.0160<br>(0.0114)   | -0.00313<br>(0.0148)  | -0.0207<br>(0.0141)    | -0.00972<br>(0.0131)          |
| Cooperative membership (10)                                             | 0.289***<br>(0.107)  | 0.0240<br>(0.112)     | 0.212*<br>(0.122)      | 0.0859<br>(0.110)             |
| Extension access (10)                                                   | 0.240**<br>(0.118)   | 0.256**<br>(0.123)    | -0.0394<br>(0.125)     | 0.138<br>(0.0960)             |
| Head is male (10)                                                       | 0.0292<br>(0.0878)   | 0.0462<br>(0.122)     | -0.0454<br>(0.111)     | 0.0355<br>(0.113)             |
| Asset index                                                             | 0.110***<br>(0.0305) | -0.0445<br>(0.0449)   | 0.168***<br>(0.0417)   | 0.125***<br>(0.0369)          |
| Constant                                                                | -0.732**<br>(0.348)  | -0.410<br>(0.406)     | -0.305<br>(0.436)      | -0.506<br>(0.486)             |
| Observations                                                            | 1,112                | 1,112                 | 1,112                  | 1,112                         |
| Additional controls                                                     | Yes                  | Yes                   | Yes                    | Yes                           |
| Village FE                                                              | Yes                  | Yes                   | Yes                    | Yes                           |
| Year FE                                                                 | Yes                  | Yes                   | Yes                    | Yes                           |
| –                                                                       | Coefficient          | Std. Err.             |                        |                               |
| atanhrho-12                                                             | -0.0154              | (0.0822)              |                        |                               |
| atanhrho-13                                                             | 0.487***             | (0.0988)              |                        |                               |
| atanhrho-14                                                             | 0.330***             | (0.0871)              |                        |                               |
| atanhrho-23                                                             | 0.173*               | (0.101)               |                        |                               |
| atanhrho-24                                                             | 0.209**              | (0.0852)              |                        |                               |
| atanhrho-34                                                             | 0.170*               | (0.0924)              |                        |                               |
| Robust standard errors in parentheses<br>*** p<0.01, ** p<0.05, * p<0.1 |                      |                       |                        |                               |

*Note:* The table displays the findings of Multivariate Probit (MVP) regressions, applied to investigate the relationship between aspiration failure and the adoption of Climate-Smart Agriculture (CSA) practices. Robust standard errors are reported in brackets to control for potential heteroscedasticity. Two-sided t-tests were conducted for the statistical tests, and corresponding p-values are noted within square brackets. Coefficients denoted with an asterisk ( ) represent statistical significance at pre-established levels (\*\* p<0.01, \*\* p<0.05, \* p<0.1). To account for potential unobserved heterogeneity, all regressions incorporate a comprehensive set of village fixed effects.

# 5 Robustness Checks

Table S9: Full Poisson and Ordered probit estimates of the relationship between aspiration and CSA practices

| variable               | POISSON                        |                                |                                | ORDERED PROBIT                 |                                |                                |
|------------------------|--------------------------------|--------------------------------|--------------------------------|--------------------------------|--------------------------------|--------------------------------|
|                        | (1)                            | (2)                            | (3)                            | (1)                            | (2)                            | (3)                            |
| Aspirations            | 0.131***<br>(0.019)<br>[0.000] | 0.124***<br>(0.018)<br>[0.000] | 0.021<br>(0.014)<br>[0.141]    | 0.210***<br>(0.031)<br>[0.000] | 0.202***<br>(0.030)<br>[0.000] | 0.039<br>(0.028)<br>[0.164]    |
| Off-farm activity      |                                | -0.024<br>(0.040)<br>[0.557]   | -0.013<br>(0.042)<br>[0.756]   |                                | -0.025<br>(0.067)<br>[0.709]   | 0.010<br>(0.084)<br>[0.906]    |
| Household size         |                                | 0.005<br>(0.005)<br>[0.381]    | 0.007<br>(0.005)<br>[0.174]    |                                | 0.008<br>(0.010)<br>[0.418]    | 0.017<br>(0.012)<br>[0.143]    |
| Credit access          |                                | 0.024<br>(0.045)<br>[0.599]    | 0.128***<br>(0.044)<br>[0.003] |                                | 0.031<br>(0.075)<br>[0.680]    | 0.254***<br>(0.085)<br>[0.003] |
| Age of head            |                                | 0.005***<br>(0.002)<br>[0.003] | -0.001<br>(0.002)<br>[0.606]   |                                | 0.009***<br>(0.003)<br>[0.002] | -0.002<br>(0.003)<br>[0.548]   |
| Educational level      |                                | 0.002<br>(0.006)<br>[0.723]    | -0.005<br>(0.006)<br>[0.404]   |                                | 0.005<br>(0.011)<br>[0.636]    | -0.012<br>(0.012)<br>[0.319]   |
| Cooperative membership |                                | 0.035<br>(0.042)<br>[0.409]    | 0.074**<br>(0.038)<br>[0.048]  |                                | 0.056<br>(0.074)<br>[0.452]    | 0.155**<br>(0.077)<br>[0.044]  |
| Extension access       |                                | 0.083*<br>(0.048)<br>[0.081]   | 0.106**<br>(0.051)<br>[0.040]  |                                | 0.131<br>(0.084)<br>[0.119]    | 0.201**<br>(0.102)<br>[0.049]  |
| Head is male           |                                | -0.006<br>(0.048)<br>[0.895]   | 0.017<br>(0.040)<br>[0.671]    |                                | -0.029<br>(0.082)<br>[0.720]   | 0.016<br>(0.077)<br>[0.833]    |
| Asset index            |                                | 0.047***<br>(0.014)<br>[0.001] | 0.051***<br>(0.017)<br>[0.003] |                                | 0.097***<br>(0.026)<br>[0.000] | 0.108***<br>(0.036)<br>[0.002] |
| Observations           | 1,112                          | 1,112                          | 1,112                          | 1,112                          | 1,112                          | 1,112                          |
| Additional controls    | No                             | Yes                            | Yes                            | No                             | Yes                            | Yes                            |
| Village FE             | No                             | No                             | Yes                            | No                             | No                             | Yes                            |

*Note:* The table provides the findings from Full Poisson and Ordered probit estimations, carried out to explore the association between aspiration and Climate-Smart Agriculture (CSA) practices. The Full Poisson model was utilized to handle count outcomes while the Ordered probit model was used for ordinal outcomes. Robust standard errors, stated within brackets, were utilized to mitigate the impact of heteroscedasticity. Statistical tests were performed using two-sided t-tests, and the corresponding p-values are displayed within square brackets. Coefficients designated with an asterisk ( ) indicate statistical significance at preset significance thresholds (\*\* p<0.01, \* p<0.05, \* p<0.1).

Table S10: Full Poisson and Ordered probit estimates of the relationship between aspiration failure and CSA practices

| variables                   | POISSON                         | ORDERED PROBIT                  |
|-----------------------------|---------------------------------|---------------------------------|
|                             | (1)                             | (2)                             |
| Aspiration gap (0-1)        | 1.729***<br>(0.461)<br>[0.000]  | 3.251***<br>(0.774)<br>[0.000]  |
| Gap squared (0-1)           | -1.493***<br>(0.364)<br>[0.000] | -2.873***<br>(0.664)<br>[0.000] |
| Off-farm activity (10)      | -0.017<br>(0.042)<br>[0.677]    | -0.010<br>(0.086)<br>[0.909]    |
| Household size (num)        | 0.007<br>(0.005)<br>[0.129]     | 0.018<br>(0.012)<br>[0.116]     |
| Credit access (10)          | 0.123***<br>(0.044)<br>[0.005]  | 0.247***<br>(0.089)<br>[0.005]  |
| Age of head (years)         | -0.001<br>(0.002)<br>[0.505]    | -0.003<br>(0.003)<br>[0.420]    |
| Educational level (years)   | -0.006<br>(0.006)<br>[0.351]    | -0.012<br>(0.013)<br>[0.325]    |
| Cooperative membership (10) | 0.055<br>(0.036)<br>[0.123]     | 0.121<br>(0.074)<br>[0.103]     |
| Extension access (10)       | 0.107**<br>(0.052)<br>[0.041]   | 0.214**<br>(0.105)<br>[0.041]   |
| Head is male (10)           | 0.010<br>(0.039)<br>[0.804]     | -0.001<br>(0.077)<br>[0.984]    |
| Asset index                 | 0.057***<br>(0.016)<br>[0.000]  | 0.116***<br>(0.033)<br>[0.000]  |
| Observations                | 1,112                           | 1,112                           |
| Additional controls         | Yes                             | Yes                             |



| Village FE | Yes | Yes |
|------------|-----|-----|
|------------|-----|-----|

*Note:* The table provides the findings from Full Poisson and Ordered probit estimations, carried out to explore the association between aspiration failure and Climate-Smart Agriculture (CSA) practices. The Full Poisson model was utilized to handle count outcomes while the Ordered probit model was used for ordinal outcomes. Robust standard errors, stated within brackets, were utilized to mitigate the impact of heteroscedasticity. Statistical tests were performed using two-sided t-tests, and the corresponding p-values are displayed within square brackets. Coefficients designated with an asterisk () indicate statistical significance at preset significance thresholds (\*\* p<0.01, \*\* p<0.05, \* p<0.1).
